# Supplementary material for: The Black Sea near-past wave climate and its variability: a hindcast study
Source: Frontiers journal article supplement (doi:10.3389/fmars.2024.1406855), 2024-06-13
Supplement: Data_Sheet_1.docx [file Data_Sheet_1.docx]

**Annex 1: Acronyms**

| BS | Black Sea |
| --- | --- |
| WW3 | WAVEWATCH III |
| CMS | Copernicus Marine Service |
| ECMWF | European Centre for Medium-Range Weather Forecasts |
| BLKMY | Black sea multi year |
| NRT | Near Real Time |
| SWH | Significant Wave Height |
| MWD | Mean Wave Direction |
| EOF | Empirical Orthogonal Function |
| EA | East-Atlantic teleconnection pattern |
| SCA | Scandinavia teleconnection pattern |
| NAO | North Atlantic Oscillation teleconnection pattern |
| EA/WR | East Atlantic/West Russia teleconnection pattern |
| Wb | Black Sea Western basin |
| Eb | Black Sea Eastern basin |
| PC | Principal Component |
| SV | Seasonal variation |
|  |  |
